# Supplementary material for: Reversible dioxygen binding on asymmetric dinuclear rhodium centres
Source: Royal Society of Chemistry journal article supplement (doi:10.1039/c3cc41815d), 2013-01-01

*Electronic Supporting Information*  
*for*

**Reversible dioxygen binding on asymmetric dinuclear rhodium centres**

*Takayuki Nakajima,\* Miyuki Sakamoto, Sachi Kurai, Bunsho Kure, Tomoaki Tanase\**

*Department of Chemistry, Faculty of Science, Nara Women's University, Kitauoya-higashi-machi, Nara 630-8506, Japan.*

*Fax: +81 742 203847; Tel: +81 742 203399; E-mail: tanase@cc.nara-wu.ac.jp*

**Experimental and spectral data for complexes 1a–c and 2a–d**

**Table S1.** Crystallographic Data of Complexes **1a**·3CH<sub>2</sub>Cl<sub>2</sub>, **1b**·2Me<sub>2</sub>CO, **2c**·4MeCN and **2d**·CH<sub>2</sub>Cl<sub>2</sub>

**Table S2.** Structural Parameters of **1a**, **1b**, **2c** and **2d**.

**Figure S1.** ORTEP diagram for **1b** with the atomic numbering scheme.

**Figure S2.** ORTEP diagram for **2c** with the atomic numbering scheme.

**Figure S3.** ESI-TOF-MS spectra of **1a** in CH<sub>2</sub>Cl<sub>2</sub>.

**Figure S4.** ESI-TOF-MS spectra of **1b** in CH<sub>2</sub>Cl<sub>2</sub>.

**Figure S5.** ESI-TOF-MS spectra of **1c** in CH<sub>2</sub>Cl<sub>2</sub>.

**Figure S6.** ESI-TOF-MS spectra of **2a** in CH<sub>2</sub>Cl<sub>2</sub>.

**Figure S7.** ESI-TOF-MS spectra of **2b** in CH<sub>2</sub>Cl<sub>2</sub>.

**Figure S8.** ESI-TOF-MS spectra of **2c** in CH<sub>2</sub>Cl<sub>2</sub>.

**Figure S9.** ESI-TOF-MS spectra of **2d** in CH<sub>2</sub>Cl<sub>2</sub>.

**Figure S10.** ESI-TOF-MS spectra of **3a** in CH<sub>2</sub>Cl<sub>2</sub>.

**Figure S11.** <sup>31</sup>P{<sup>1</sup>H} NMR spectrum of **3a** in CD<sub>2</sub>Cl<sub>2</sub>.

**Figure S12.** DFT full-optimized structures of (a) **1a** and (d) **2d** by B3LYP methods with lanl2dz.

**Figure S13.** Representative MO diagrams for the DFT optimized structure of (a) **1a** and (b) **2d** by B3LYP methods with lanl2dz.

**Figure S14.** Natural population analyses, natural charge and Wiberg bond indices, for the DFT optimized structures of (a) **1a** and (b) **2d** by B3LYP methods with lanl2dz.

## Experimental and spectral data for complexes 1a–c and 2a–d

### General procedure for the synthesis of 1a–c

To a solution of dpmp<sub>3</sub> in dichloromethane (10 mL) was added 1 eq. of [RhCl(cod)]<sub>2</sub> and 1 eq. of RNC, and the reaction mixture was stirred at room temperature for 12 h. The solvent was removed under reduced pressure to dryness and the residue was washed with Et<sub>2</sub>O (5 mL × 3) and acetone (3 mL × 1) and extracted with 10 mL of dichloromethane. The extract was concentrated to ca. 3 mL. After addition of diethyl ether, the solution was allowed to stand at room temperature to afford pale orange crystals of 1a–c.

**[Rh<sub>2</sub>Cl<sub>2</sub>(dpmp<sub>3</sub>)(XylNC)]·Et<sub>2</sub>O·0.5CH<sub>2</sub>Cl<sub>2</sub> (1a).** Yield: 180 mg, 74% from dpmp<sub>3</sub> (0.169 mmol). Anal. Calcd for C<sub>55.5</sub>H<sub>62</sub>Cl<sub>5</sub>NOP<sub>4</sub>Rh<sub>2</sub>: C, 52.65; H, 4.94; N, 1.10. Found: C, 52.83; H, 5.05; N, 1.37. IR (KBr): ν 2058 (s), 1434 (s), 1098 (s), 743 (m), 718 (m), 694 (m) cm<sup>-1</sup>. ESI-MS (CH<sub>2</sub>Cl<sub>2</sub>): *m/z* 1028.02 (*z*<sub>1</sub>, [Rh<sub>2</sub>Cl(dpmp<sub>3</sub>)(XylNC)]<sup>+</sup> (1028.06)). <sup>1</sup>H NMR (CD<sub>2</sub>Cl<sub>2</sub>): δ 1.1 (m, 1H, CH<sub>2</sub>), 1.67 (s, 6H, *o*-Me (Xyl)), 2.0 (m, 1H, CH<sub>2</sub>), 2.28 (brs, 4H, CH<sub>2</sub>), 3.41 (m, 2H, CH<sub>2</sub>), 4.72 (m, 2H, CH<sub>2</sub>), 6.78–8.04 (m, 33H, Ph). <sup>31</sup>P{<sup>1</sup>H} NMR (CD<sub>2</sub>Cl<sub>2</sub>): δ 15.6 (dt, 2P, <sup>1</sup>*J*<sub>PRh</sub> = 134 Hz, <sup>2</sup>*J*<sub>PP</sub> = 38 Hz, P<sub>out</sub>), 21.0 (dt, 2P, <sup>1</sup>*J*<sub>PRh</sub> = 143 Hz, <sup>2</sup>*J*<sub>PP</sub> = 35 Hz, P<sub>in</sub>).

**[Rh<sub>2</sub>Cl<sub>2</sub>(dpmp<sub>3</sub>)(DipNC)]·0.5CH<sub>2</sub>Cl<sub>2</sub> (1b).** Yield: 54.2 mg, 64% from dpmp<sub>3</sub> (0.075 mmol). Anal. Calcd for C<sub>54.5</sub>H<sub>58</sub>Cl<sub>3</sub>NP<sub>4</sub>Rh<sub>2</sub>: C, 56.28; H, 5.03; N, 1.20. Found: C, 56.24; H, 4.71; N, 1.25. IR (KBr): ν 2051 (s), 1434 (s), 1097 (s), 742 (m), 717 (m), 693 (m) cm<sup>-1</sup>. ESI-MS (CH<sub>2</sub>Cl<sub>2</sub>): *m/z* 1084.09 (*z*<sub>1</sub>, [Rh<sub>2</sub>Cl(dpmp<sub>3</sub>)(DipNC)]<sup>+</sup> (1084.12)). <sup>1</sup>H NMR (CD<sub>2</sub>Cl<sub>2</sub>): δ 0.71 (d, 12H, Me (<sup>*i*</sup>Pr), *J* = 7 Hz), 1.10 (m, 1H, CH<sub>2</sub>), 2.00 (m, 1H, CH<sub>2</sub>), 2.22 (brs, 4H, CH<sub>2</sub>), 2.53 (7, 2H, CH (<sup>*i*</sup>Pr)), 3.44 (m, 2H, CH<sub>2</sub>), 4.71 (m, 2H, CH<sub>2</sub>), 6.85–8.03 (m, 33H, Ph). <sup>31</sup>P{<sup>1</sup>H} NMR (CD<sub>2</sub>Cl<sub>2</sub>): δ 15.6 (dt, 2P, <sup>1</sup>*J*<sub>PRh</sub> = 131 Hz, <sup>2</sup>*J*<sub>PP</sub> = 36 Hz, P<sub>out</sub>), 21.0 (dt, 2P, <sup>1</sup>*J*<sub>PRh</sub> = 143 Hz, <sup>2</sup>*J*<sub>PP</sub> = 36 Hz, P<sub>in</sub>).

**[Rh<sub>2</sub>Cl<sub>2</sub>(dpmp<sub>3</sub>)(MesNC)]·CH<sub>2</sub>Cl<sub>2</sub> (1c).** Yield: 98.3 mg, 61% from dpmp<sub>3</sub> (0.091 mmol). Anal. Calcd for C<sub>52</sub>H<sub>53</sub>Cl<sub>4</sub>NP<sub>4</sub>Rh<sub>2</sub>: C, 53.68; H, 4.59; N, 1.20. Found: C, 53.50; H, 4.82; N, 1.10. IR (KBr): ν 2043 (s), 1433 (s), 1099 (s), 740 (m), 722 (m), 693 (m) cm<sup>-1</sup>. ESI-MS (CH<sub>2</sub>Cl<sub>2</sub>): *m/z* 1042.15 (*z*<sub>1</sub>, [Rh<sub>2</sub>Cl(dpmp<sub>3</sub>)(MesNC)]<sup>+</sup> (1042.08)). <sup>1</sup>H NMR (CD<sub>2</sub>Cl<sub>2</sub>): δ 1.10 (m, 1H, CH<sub>2</sub>), 1.62 (s, 6H, *o*-Me (Mes)), 2.0 (m, 1H, CH<sub>2</sub>), 2.12 (s, 4H, *p*-Me (Mes)), 2.27 (s, 4H, CH<sub>2</sub>), 3.39 (m, 2H, CH<sub>2</sub>), 4.71 (m, 2H, CH<sub>2</sub>), 6.60–8.04 (m, 32H, Ph). <sup>31</sup>P{<sup>1</sup>H} NMR (CD<sub>2</sub>Cl<sub>2</sub>): δ 15.5 (dt, 2P, <sup>1</sup>*J*<sub>PRh</sub> = 133 Hz, <sup>2</sup>*J*<sub>PP</sub> = 40, 35 Hz, P<sub>out</sub>), 21.1 (dt, 2P, <sup>1</sup>*J*<sub>PRh</sub> = 143 Hz, <sup>2</sup>*J*<sub>PP</sub> = 38, 35 Hz, P<sub>in</sub>).

### General procedure for the synthesis of 2a–c

The solution of **1a–c** in CD<sub>2</sub>Cl<sub>2</sub> (0.4 mL) was placed at -15 °C and reaction progress was monitored by <sup>31</sup>P{<sup>1</sup>H} NMR. After 24 h, **2a–c** were formed in quantitative yields. Solvent was removed under reduced pressure to dryness to give the mixture of **2** and **1** with the ration of ca 9 : 1, which were used for IR measurements.

#### [Rh<sub>2</sub>Cl<sub>2</sub>(O<sub>2</sub>)(dpmppp)(XylNC)] (**2a**).

IR (KBr): ν 2136 (s), 1434 (s), 1096 (m), 803 (m), 742 (m), 719 (m) cm<sup>-1</sup>. ESI-MS (CH<sub>2</sub>Cl<sub>2</sub>): *m/z* 1060.08 (*z*<sub>1</sub>, [Rh<sub>2</sub>Cl(O<sub>2</sub>)(dpmppp)(XylNC)]<sup>+</sup> (1060.05)). <sup>1</sup>H NMR (CD<sub>2</sub>Cl<sub>2</sub>): δ 1.20-1.32 (m, 1H, CH<sub>2</sub>), 1.98 (s, 6H, *o*-Me (Xyl)), 2.00 (m, 1H, CH<sub>2</sub>), 2.45 (m, 2H, CH<sub>2</sub>), 2.94 (m, 2H, CH<sub>2</sub>), 3.48 (m, 2H, CH<sub>2</sub>), 4.71 (m, 2H, CH<sub>2</sub>), 6.95-8.14 (m, 33H, Ph). <sup>31</sup>P{<sup>1</sup>H} NMR (CD<sub>2</sub>Cl<sub>2</sub>): δ 9.6 (dt, 2P, <sup>1</sup>*J*<sub>PRh</sub> = 96 Hz, <sup>2</sup>*J*<sub>PP</sub> = 32 Hz, P<sub>out</sub>), 27.6 (dt, 2P, <sup>1</sup>*J*<sub>PRh</sub> = 136 Hz, <sup>2</sup>*J*<sub>PP</sub> = 32 Hz, P<sub>in</sub>).

#### [Rh<sub>2</sub>Cl<sub>2</sub>(O<sub>2</sub>)(dpmppp)(DipNC)] (**2b**).

IR (KBr): ν 2137 (s), 1438 (s), 1098 (m), 741 (m), 715 (m) cm<sup>-1</sup>. ESI-MS (CH<sub>2</sub>Cl<sub>2</sub>): *m/z* 1116.20 (*z*<sub>1</sub>, [Rh<sub>2</sub>Cl(O<sub>2</sub>)(dpmppp)(DipNC)]<sup>+</sup> (1116.11)). <sup>1</sup>H NMR (CD<sub>2</sub>Cl<sub>2</sub>): δ 0.97 (s, 12H, Me (*i*Pr)), 1.20-1.32 (m, 1H, CH<sub>2</sub>), 2.02 (m, 1H, CH<sub>2</sub>), 2.46 (m, 2H, CH<sub>2</sub>), 2.95 (m, 2H, CH<sub>2</sub>), 3.36 (m, 2H, CH (*i*Pr)), 3.46 (m, 2H, CH<sub>2</sub>), 4.56 (m, 2H, CH<sub>2</sub>), 6.80-8.40 (m, 33H, Ph). <sup>31</sup>P{<sup>1</sup>H} NMR (CD<sub>2</sub>Cl<sub>2</sub>): δ 11.3 (dt, 2P, <sup>1</sup>*J*<sub>PRh</sub> = 97 Hz, <sup>2</sup>*J*<sub>PP</sub> = 32 Hz, P<sub>out</sub>), 27.5 (dt, 2P, <sup>1</sup>*J*<sub>PRh</sub> = 136 Hz, <sup>2</sup>*J*<sub>PP</sub> = 33 Hz, P<sub>in</sub>).

#### [Rh<sub>2</sub>Cl<sub>2</sub>(O<sub>2</sub>)(dpmppp)(MesNC)] (**2c**).

IR (KBr): ν 2137 (s), 1435 (m), 1098 (m) cm<sup>-1</sup>. ESI-MS (CH<sub>2</sub>Cl<sub>2</sub>): *m/z* 1074.17 (*z*<sub>1</sub>, [Rh<sub>2</sub>Cl(O<sub>2</sub>)(dpmppp)(MesNC)]<sup>+</sup> (1074.07)). <sup>1</sup>H NMR (CD<sub>2</sub>Cl<sub>2</sub>): δ 1.20-1.32 (m, 1H, CH<sub>2</sub>), 1.94 (s, 6H, *o*-Me (Mes)), 2.01 (m, 1H, CH<sub>2</sub>), 2.27 (s, 3H, *p*-Me (Mes)), 2.46 (m, 2H, CH<sub>2</sub>), 2.95 (m, 2H, CH<sub>2</sub>), 3.47 (m, 2H, CH<sub>2</sub>), 4.72 (m, 2H, CH<sub>2</sub>), 6.70-8.10 (m, 32H, Ph). <sup>31</sup>P{<sup>1</sup>H} NMR (CD<sub>2</sub>Cl<sub>2</sub>): δ 9.4 (dt, 2P, <sup>1</sup>*J*<sub>PRh</sub> = 97 Hz, <sup>2</sup>*J*<sub>PP</sub> = 34 Hz, P<sub>out</sub>), 27.5 (dt, 2P, <sup>1</sup>*J*<sub>PRh</sub> = 136 Hz, <sup>2</sup>*J*<sub>PP</sub> = 35 Hz, P<sub>in</sub>).

Crystals of **2c** suitable for X-ray analysis was obtained by recrystallization from CH<sub>3</sub>CN / Et<sub>2</sub>O.

#### [Rh<sub>2</sub>Cl<sub>2</sub>(O<sub>2</sub>)(dpmppp)(<sup>t</sup>BuNC)] (**2d**).

To a solution of [Rh<sub>3</sub>Cl<sub>3</sub>(dpmppp)(CO)<sub>2</sub>] (17.0 mg, 0.015 mmol) in CH<sub>2</sub>Cl<sub>2</sub> (10 mL) was added <sup>t</sup>BuNC. The mixture was concentrated to ca. 3mL. After addition of Et<sub>2</sub>O, the solution was stored at -15 °C to afford red precipitates, which was removed by

filtration. The filtrate was allowed to stand at room temperature under air to give red crystals of **2d**. Yield: 5 mg, 29%. Anal. Calcd for  $C_{54}H_{68}Cl_6NO_{3.5}P_4Rh_2$ : C, 48.78; H, 5.16; N, 1.05. Found: C, 48.73; H, 5.06; N, 1.05. IR (KBr):  $\nu$  2182 (s), 1434 (s), 1099 (s), 861 (w), 742 (m), 721 (m), 694 (m)  $cm^{-1}$ . ESI-MS ( $CH_2Cl_2$ ):  $m/z$  1012.45 ( $z1$ ,  $[Rh_2Cl(dpmppp)(^tBuNC)]^+$  (1012.05)).  $^1H$  NMR ( $CD_2Cl_2$ ):  $\delta$  0.83 (s, 9H, Me ( $^tBu$ )), 1.30 (m, 1H,  $CH_2$ ), 2.15 (m, 1H,  $CH_2$ ), 2.51 (m, 2H,  $CH_2$ ), 2.96 (m, 2H,  $CH_2$ ), 3.33 (m, 2H,  $CH_2$ ), 5.07 (m, 2H,  $CH_2$ ), 7.20-8.14 (m, 30H, Ph).  $^{31}P\{^1H\}$  NMR ( $CD_2Cl_2$ ):  $\delta$  5.8 (dt, 2P,  $^1J_{PRh} = 97$  Hz,  $^2J_{PP} = 33$  Hz,  $P_{out}$ ), 27.3 (dt, 2P,  $^1J_{PRh} = 143$  Hz,  $^2J_{PP} = 35$  Hz,  $P_{in}$ ).

### Reaction of **2a** with HCl in the presence of $PPh_3$ .

After a solution of **1a** (8.2 mg, 7.7  $\mu$ mol) in  $CD_2Cl_2$  (0.4 ml) was kept for 24 h at  $-15$  °C under air, **2a** was formed quantitatively, which was confirmed by  $^{31}P\{^1H\}$  NMR. To the solution, HCl in  $Et_2O$  (1.0 M, 23.1  $\mu$ l, 23.1  $\mu$ mol) and  $PPh_3$  (2.0 mg, 7.6  $\mu$ mol) were added successively at room temperature to form  $[Rh_2Cl_4(dpmppp)(XylNC)]$  (**3a**) and  $Ph_3P=O$  in 95 and 75% yields, respectively.

**3a**: IR (KBr):  $\nu$  2167 (s), 1435 (s), 1098 (s), 739 (m), 691 (m)  $cm^{-1}$ . ESI-MS ( $CH_2Cl_2$ ):  $m/z$  1098.02 ( $z1$ ,  $[Rh_2Cl_3(dpmppp)(XylNC)]^+$  (1098.00)), 966.95 ( $z1$ ,  $[Rh_2Cl_3(dpmppp)]^+$  (966.93)).  $^1H$  NMR ( $CD_2Cl_2$ ):  $\delta$  1.33 (m, 2H,  $CH_2$ ), 2.01 (m, 2H,  $CH_2$ ), 3.70 (m, 4H,  $CH_2$ ), 4.60 (m, 2H,  $CH_2$ ), 6.93-8.07 (m, 33H, Ph).  $^{31}P\{^1H\}$  NMR ( $CD_2Cl_2$ ):  $\delta$  4.6 (dt, 2P,  $^1J_{PRh} = 90$  Hz,  $^2J_{PP} = 32$  Hz,  $P_{out}$ ), 32.1 (dt, 2P,  $^1J_{PRh} = 135$  Hz,  $^2J_{PP} = 31$  Hz,  $P_{in}$ ).

**X-ray Crystallography.** The crystals of **1a**·3 $CH_2Cl_2$ , **1b**·2 $Me_2CO$ , **2c**·4 $MeNC$ ·0.5 $H_2O$  and **2d**· $CH_2Cl_2$  suitable for X-ray analyses were quickly coated with Paratone N oil and mounted on top of a loop fiber at room temperature. Crystal and experimental data are summarized in Tables S1–2. All data were collected at  $-120$  °C on a Rigaku AFC8R/Mercury CCD diffractometer equipped with graphite-monochromated Mo  $K\alpha$  radiation using a rotating-anode X-ray generator (50 kV, 180 mA) and a Rigaku VariMax Mo/Saturn CCD diffractometer equipped with graphite-monochromated Mo  $K\alpha$  radiation using a rotating-anode X-ray generator RA-Micro7 (50 kV, 24 mA). A total of 1440 for **1a**, **1b**, **2c** and 2160 for **2d** oscillation images, covering a whole sphere of  $6^\circ < 2\theta < 55^\circ$  were corrected by  $\omega$ -scan method. The crystal-to-detector (70  $\times$  70 mm) distance was set at 45 or 60 mm. The data were processed using the *Crystal Clear 1.3.5* program (Rigaku/MS)<sup>1</sup> and corrected for

Lorentz–polarization and absorption effects.<sup>2</sup> The structures of complexes were solved by direct methods with SHELXS-97<sup>3</sup> (**2d**) and SIR-92<sup>4</sup> (**1a**, **1b**, **2c**), and were refined on  $F^2$  with full-matrix least-squares techniques with SHELXL-97<sup>3</sup> using *Crystal Structure 4.0* package.<sup>5</sup> All non-hydrogen atoms were refined with anisotropic thermal parameters, and the C-H hydrogen atoms were calculated at ideal positions and refined with riding models. All calculations were carried out on a Windows PC with *Crystal Structure 4.0* package.<sup>5</sup>

In the structure of **1a**, the solvated two CH<sub>2</sub>Cl<sub>2</sub> molecules are distorted with two sites for each molecule and the populations were refined as C52/C53 = C17/C16 = 0.53/0.47 and C54/C55 = C19/C110 = 0.58/0.42. The distorted molecules were refined anisotropically with constrained and fvar techniques. In **2c**, the SQUEEZE program of the PLATON suite found a void of 146 Å<sup>3</sup> at (0, 0, 0.5) and removed 17 e<sup>-</sup>, corresponding to a MeCN/cell. This molecule could not be located owing to disorder. However, this molecule is included in the empirical formula and calculations based on it.

## References

- 1) *Crystal Clear, version 1.3.5; Operating software for the CCD detector system*, Rigaku and Molecular Structure Corp., Tokyo, Japan and The Woodlands, Texas, 2003.
- 2) Jacobson, R. *REQAB*; Molecular Structure Corporation: The Woodlands, Texas, USA, 1998.
- 3) Sheldrick, G. M. *SHELXL-97: Program for the Refinement of Crystal Structures*. University of Göttingen, Göttingen, Germany, 1996.
- 4) Altomare, A.; Burla, M. C.; Camalli, M.; Cascarano, M.; Giacovazzo, C.; Guagliardi, A.; Polidori, G. *J. Appl. Cryst.* **1994**, *27*, 435-436.
- 5) *CrystalStructure 4.0: Crystal Structure Analysis Package*, Rigaku Corporation (2000-2010). Tokyo 196-8666, Japan.

**Table S1. Crystallographic Data of Complexes 1a·3CH<sub>2</sub>Cl<sub>2</sub>, 1b·2Me<sub>2</sub>CO, 2c·4.5MeNC and 2d·CH<sub>2</sub>Cl<sub>2</sub>**

| Compound                                       | <b>1a</b> ·3CH <sub>2</sub> Cl <sub>2</sub>                                     | <b>1b</b> ·2Me <sub>2</sub> CO                                                 | <b>2c</b> ·4.5MeNC                                                                                                  | <b>2d</b> ·CH <sub>2</sub> Cl <sub>2</sub>                                                        |
|------------------------------------------------|---------------------------------------------------------------------------------|--------------------------------------------------------------------------------|---------------------------------------------------------------------------------------------------------------------|---------------------------------------------------------------------------------------------------|
| formula                                        | C <sub>53</sub> H <sub>55</sub> Cl <sub>8</sub> NP <sub>4</sub> Rh <sub>2</sub> | C <sub>60</sub> H <sub>69</sub> NO <sub>2</sub> P <sub>4</sub> Rh <sub>2</sub> | C <sub>60</sub> H <sub>64.5</sub> Cl <sub>2</sub> N <sub>5.5</sub><br>O <sub>2</sub> P <sub>4</sub> Rh <sub>2</sub> | C <sub>47</sub> H <sub>51</sub> Cl <sub>4</sub> NO <sub>2</sub><br>P <sub>4</sub> Rh <sub>2</sub> |
| formula wt                                     | 1319.35                                                                         | 1236.82                                                                        | 1295.32                                                                                                             | 1133.44                                                                                           |
| cryst. syst                                    | monoclinic                                                                      | monoclinic                                                                     | triclinic                                                                                                           | orthorhombic                                                                                      |
| space group                                    | <i>P</i> 2 <sub>1</sub> / <i>n</i>                                              | <i>P</i> 2 <sub>1</sub> / <i>n</i>                                             | <i>P</i> 1-                                                                                                         | <i>Pna</i> 2 <sub>1</sub>                                                                         |
| <i>a</i> , Å                                   | 13.404(7)                                                                       | 13.687(5)                                                                      | 12.604(6)                                                                                                           | 29.706(15)                                                                                        |
| <i>b</i> , Å                                   | 14.372(8)                                                                       | 14.485(6)                                                                      | 12.861(5)                                                                                                           | 14.423(7)                                                                                         |
| <i>c</i> , Å                                   | 30.132(12)                                                                      | 29.226(11)                                                                     | 20.226(9)                                                                                                           | 11.405(6)                                                                                         |
| $\alpha$ , deg                                 |                                                                                 |                                                                                | 73.940(7)                                                                                                           |                                                                                                   |
| $\beta$ , deg                                  | 95.9511(12)                                                                     | 91.683(6)                                                                      | 80.980(6)                                                                                                           |                                                                                                   |
| $\gamma$ , deg                                 |                                                                                 |                                                                                | 74.474(7)                                                                                                           |                                                                                                   |
| <i>V</i> , Å <sup>3</sup>                      | 5773(5)                                                                         | 5792(4)                                                                        | 3023(3)                                                                                                             | 4887(4)                                                                                           |
| <i>Z</i>                                       | 4                                                                               | 4                                                                              | 2                                                                                                                   | 4                                                                                                 |
| temp, °C                                       | -120                                                                            | -120                                                                           | -120                                                                                                                | -120                                                                                              |
| <i>D</i> <sub>calcd</sub> , g cm <sup>-3</sup> | 1.518                                                                           | 1.418                                                                          | 1.423                                                                                                               | 1.541                                                                                             |
| $\mu$ , mm <sup>-1</sup> (Mo K $\alpha$ )      | 1.086                                                                           | 0.813                                                                          | 0.784                                                                                                               | 1.061                                                                                             |
| F(000)                                         | 2664                                                                            | 2544                                                                           | 1326                                                                                                                | 2296                                                                                              |
| 2 $\theta$ range, deg                          | 6–55                                                                            | 6–55                                                                           | 6–55                                                                                                                | 6–55                                                                                              |
| <i>R</i> <sub>int</sub>                        | 0.050                                                                           | 0.052                                                                          | 0.051                                                                                                               | 0.065                                                                                             |
| no. of reflns collected                        | 54025                                                                           | 66152                                                                          | 35608                                                                                                               | 42551                                                                                             |
| no. of unique reflns                           | 13226                                                                           | 13179                                                                          | 13775                                                                                                               | 10915                                                                                             |
| no. of obsd reflns                             | 11658                                                                           | 10861                                                                          | 10071                                                                                                               | 9275                                                                                              |
| ( <i>I</i> > 2 $\sigma$ ( <i>I</i> ))          |                                                                                 |                                                                                |                                                                                                                     |                                                                                                   |
| no. of variables                               | 651                                                                             | 648                                                                            | 674                                                                                                                 | 542                                                                                               |
| <i>R</i> 1 <sup>a</sup>                        | 0.056                                                                           | 0.059                                                                          | 0.064                                                                                                               | 0.067                                                                                             |
| <i>wR</i> 2 <sup>b</sup>                       | 0.147                                                                           | 0.155                                                                          | 0.193                                                                                                               | 0.183                                                                                             |
| <i>GOF</i>                                     | 1.086                                                                           | 1.159                                                                          | 1.069                                                                                                               | 1.067                                                                                             |
| Flack Parameter                                |                                                                                 |                                                                                |                                                                                                                     | 0.08(4)                                                                                           |
| CCDC number                                    | CCDC 928791                                                                     | CCDC 928792                                                                    | CCDC 928793                                                                                                         | CCDC 928794                                                                                       |

<sup>a</sup>  $R1 = \sum ||F_o| - |F_c|| / \sum |F_o|$  (for obsd. refs with  $I > 2\sigma(I)$ ). <sup>b</sup>  $wR2 = [\sum w(F_o^2 - F_c^2)^2 / \sum w(F_o^2)^2]^{1/2}$  (for all refs).

**Table S2. Structural Parameters of 1a, 1b, 2c and 2d.<sup>a</sup>**

|             | <b>1a</b>  | <b>1b</b>  | <b>2c</b>  | <b>2d</b>  |
|-------------|------------|------------|------------|------------|
| Rh1–Rh2     | 2.6873(10) | 2.6949(10) | 2.7455(10) | 2.7637(7)  |
| Rh1–Cl1     | 2.3845(14) | 2.4179(14) | 2.4016(17) | 2.4278(19) |
| Rh1–Cl2     | 2.4030(15) | 2.3864(13) | 2.4121(16) | 2.412(2)   |
| Rh1–P2      | 2.2034(15) | 2.1993(12) | 2.1928(16) | 2.2259(19) |
| Rh1–P3      | 2.2027(14) | 2.2074(13) | 2.2026(16) | 2.2112(19) |
| Rh2–P1      | 2.3095(14) | 2.3002(13) | 2.3472(14) | 2.363(2)   |
| Rh2–P4      | 2.2951(15) | 2.3061(12) | 2.3649(14) | 2.3650(19) |
| Rh2–C1      | 1.844(4)   | 1.864(5)   | 1.927(6)   | 1.950(8)   |
| Rh2–O1      |            |            | 2.016(5)   | 2.039(5)   |
| Rh2–O2      |            |            | 2.026(4)   | 2.021(5)   |
| C1–N1       | 1.169(6)   | 1.164(6)   | 1.158(7)   | 1.189(10)  |
| O1–O2       |            |            | 1.436(4)   | 1.449(7)   |
| Rh1–Rh2–O1  |            |            | 114.83(9)  | 118.64(14) |
| Rh1–Rh2–O2  |            |            | 156.41(10) | 160.44(15) |
| O1–Rh1–O2   |            |            | 41.63(13)  | 41.8(2)    |
| Rh1–Rh2–C1  | 172.79(13) | 167.97(14) | 83.14(13)  | 79.7(2)    |
| Cl1–Rh1–Cl2 | 89.50(5)   | 89.91(4)   | 89.52(5)   | 88.96(6)   |
| P2–Rh1–P3   | 95.10(5)   | 94.41(5)   | 94.46(6)   | 93.59(6)   |
| P1–Rh2–P4   | 170.89(4)  | 167.19(4)  | 170.41(6)  | 172.40(7)  |

<sup>a</sup>The atomic numbering schemes are shown in Figures 1, 4, S1 and S2.

**Figure S1.** ORTEP diagram for **1b** with the atomic numbering scheme. The thermal ellipsoids are drawn at the 40% probability level, and the hydrogen atoms are omitted for clarity.

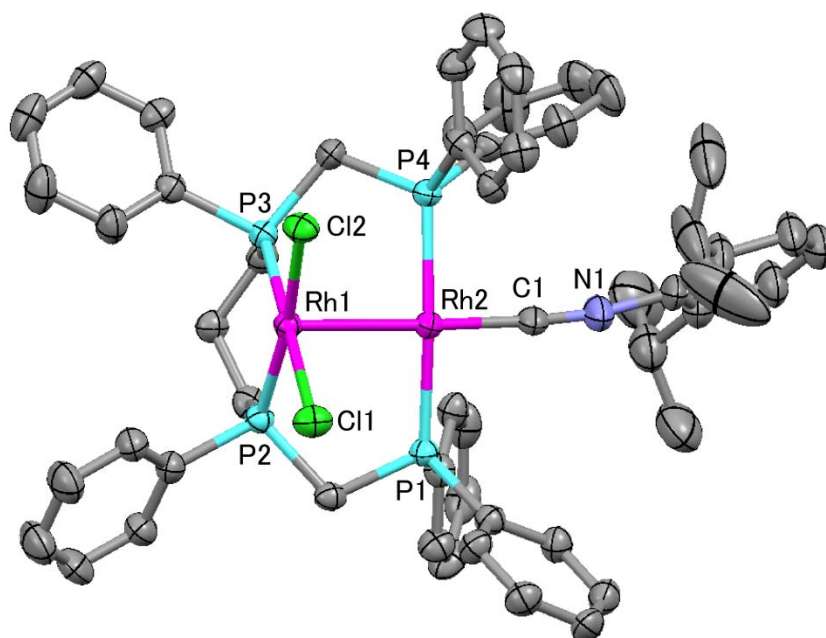

**Figure S2.** ORTEP diagram for **2c** with the atomic numbering scheme. The thermal ellipsoids are drawn at the 40% probability level, and the hydrogen atoms are omitted for clarity.

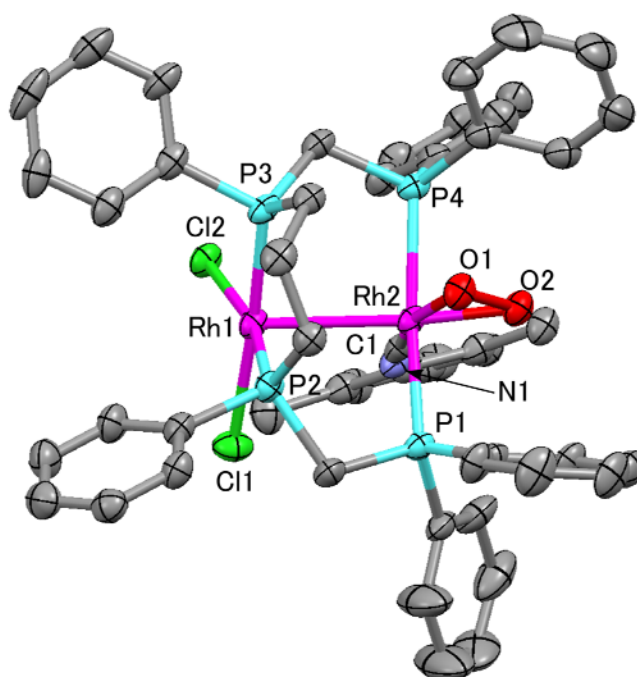



**Figure S3.** ESI-TOF-MS spectra of **1a** in CH<sub>2</sub>Cl<sub>2</sub>.

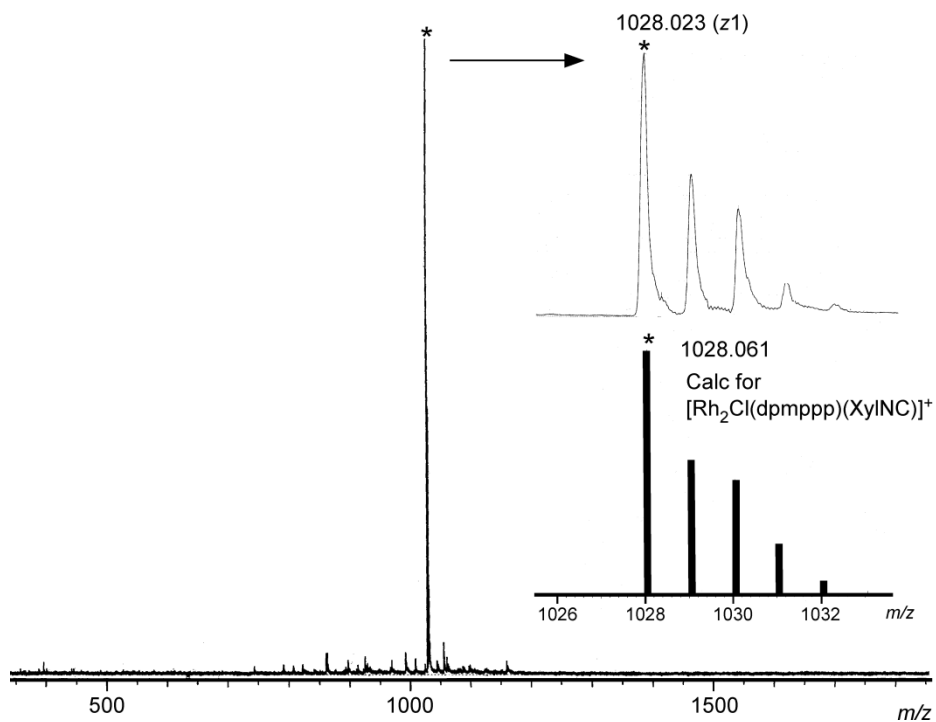

**Figure S4.** ESI-TOF-MS spectra of **1b** in CH<sub>2</sub>Cl<sub>2</sub>.

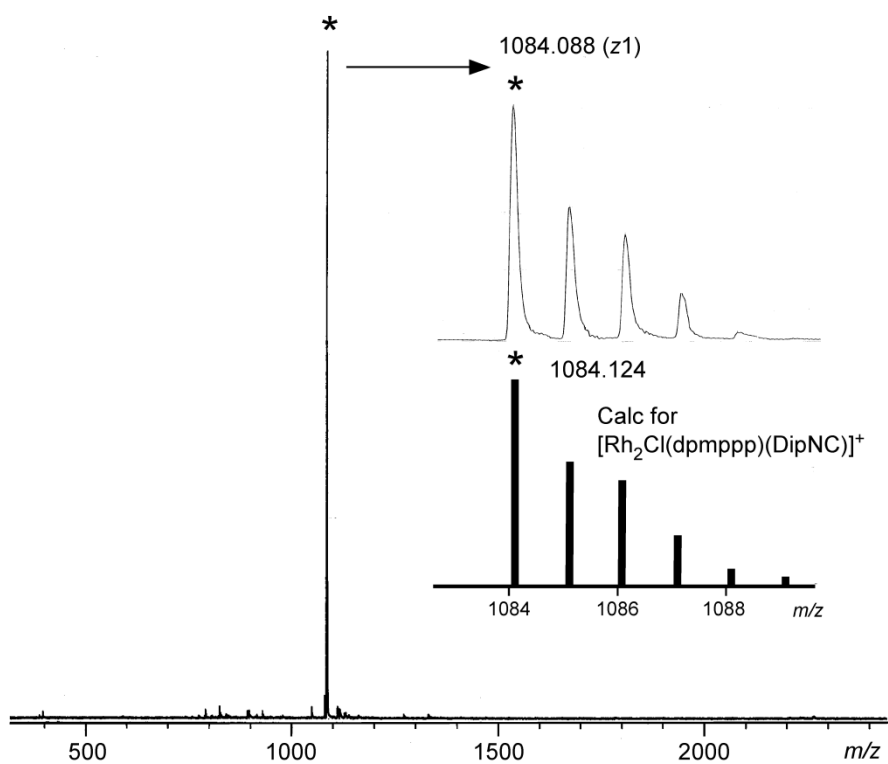

**Figure S5.** ESI-TOF-MS spectra of **1c** in CH<sub>2</sub>Cl<sub>2</sub>.

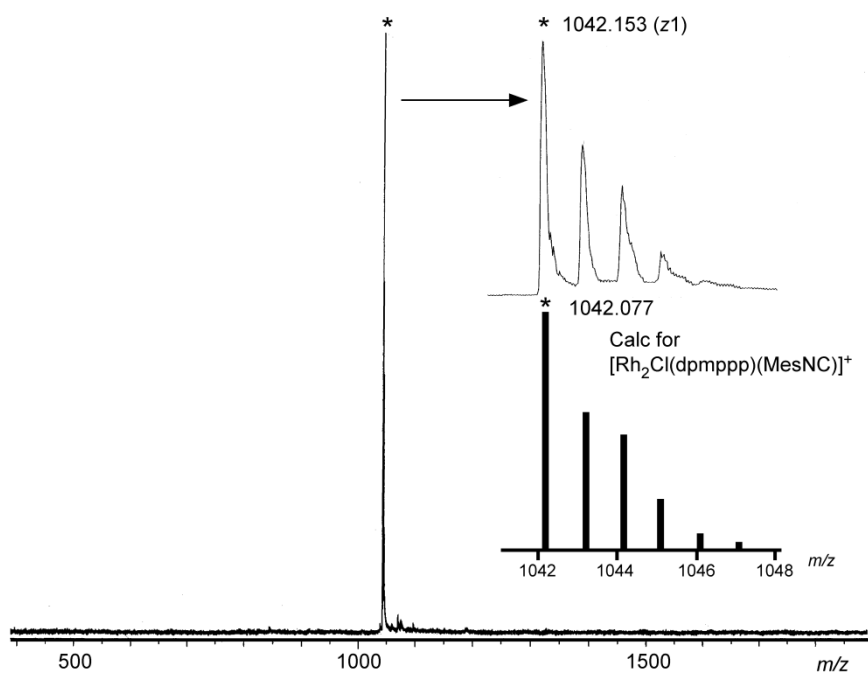

**Figure S6.** ESI-TOF-MS spectra of **2a** in CH<sub>2</sub>Cl<sub>2</sub>.

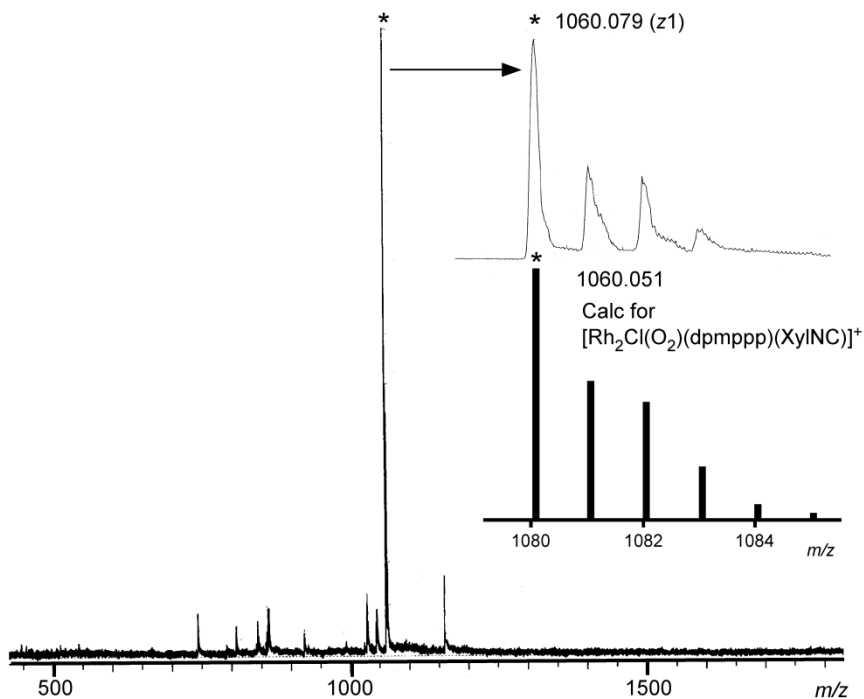

**Figure S7.** ESI-TOF-MS spectra of **2b** in CH<sub>2</sub>Cl<sub>2</sub>.

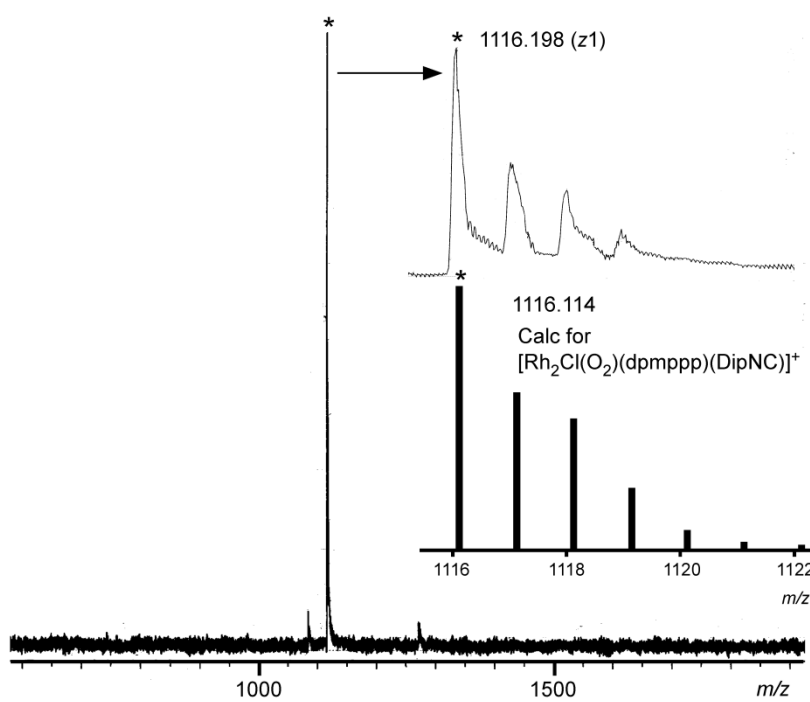

**Figure S8.** ESI-TOF-MS spectra of **2c** in CH<sub>2</sub>Cl<sub>2</sub>.

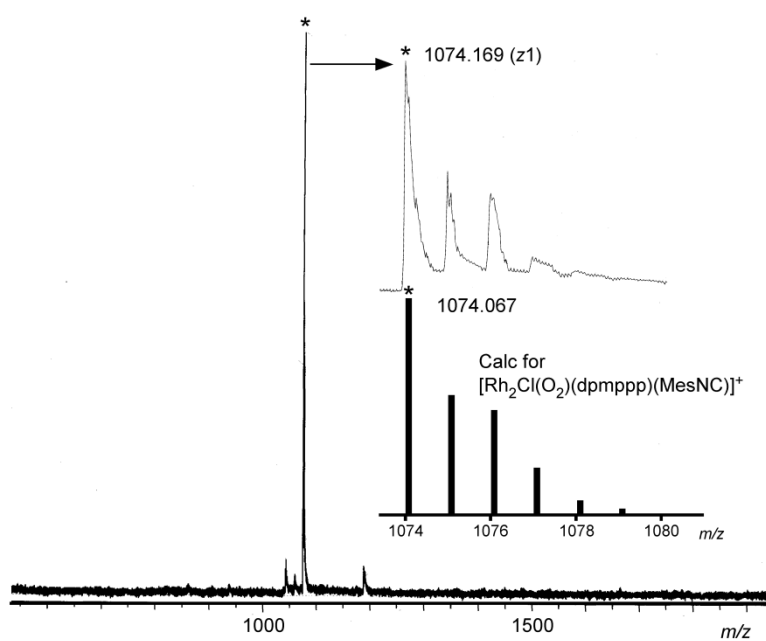

**Figure S9.** ESI-TOF-MS spectra of **2d** in CH<sub>2</sub>Cl<sub>2</sub>.

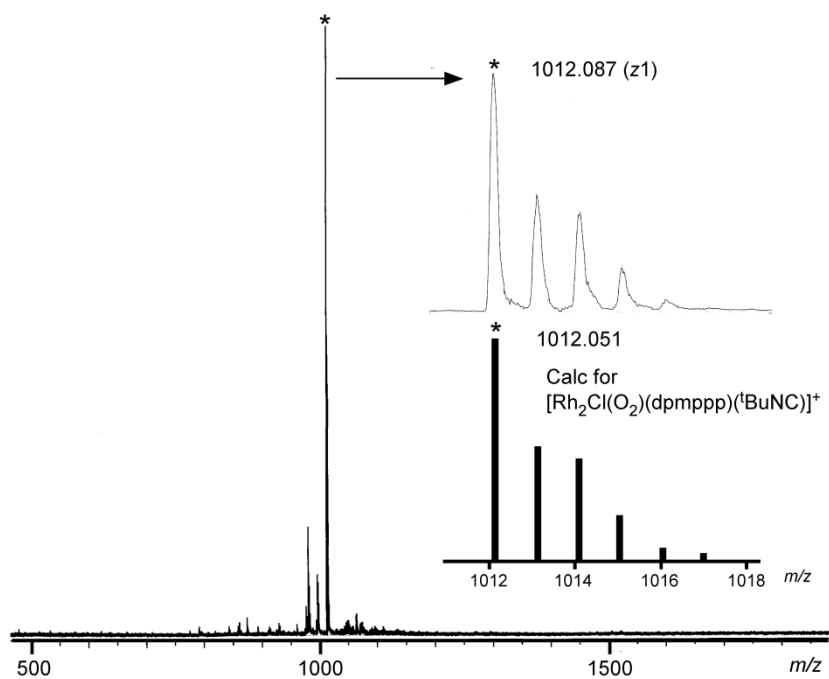

**Figure S10.** ESI-TOF-MS spectra of **3a** in CH<sub>2</sub>Cl<sub>2</sub>.

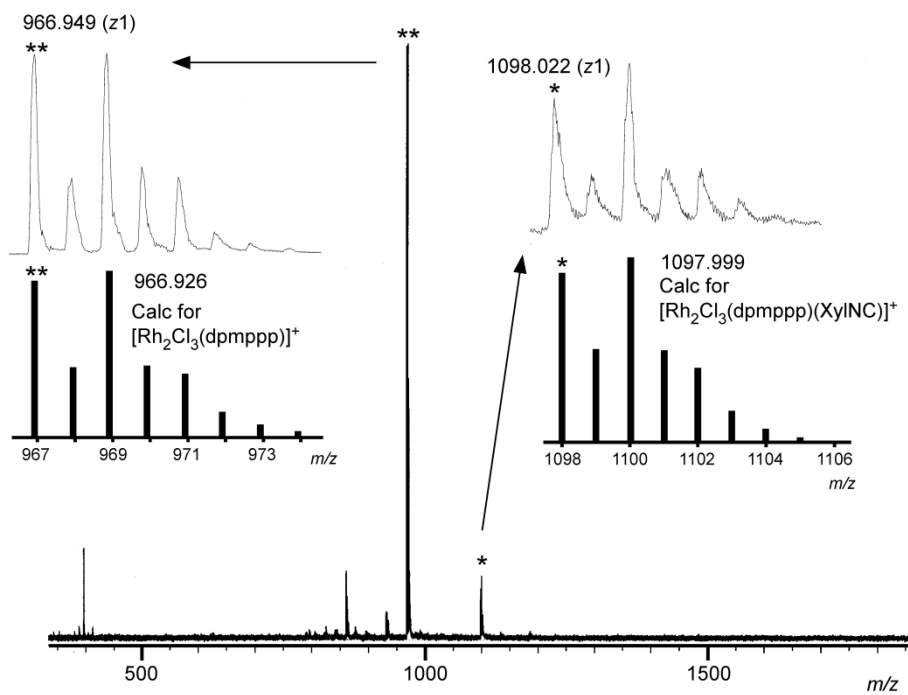

**Figure S11.**  $^{31}\text{P}\{^1\text{H}\}$  NMR spectrum of **3a** in  $\text{CD}_2\text{Cl}_2$ .

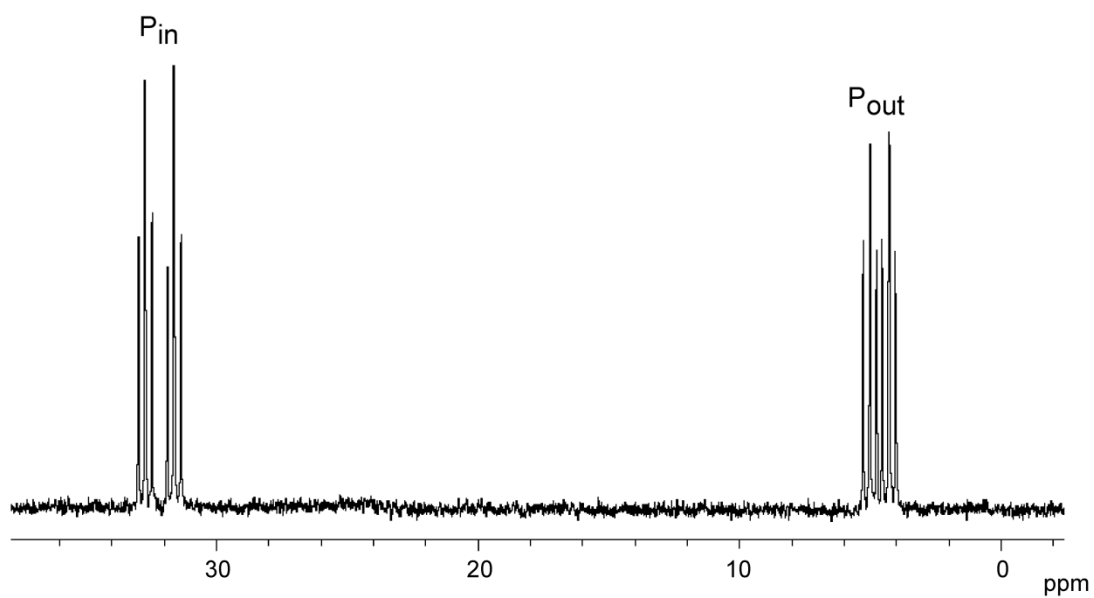

**Figure S12.** DFT full-optimized structures of (a) **1a** and (d) **2d** by B3LYP methods with lanl2dz.

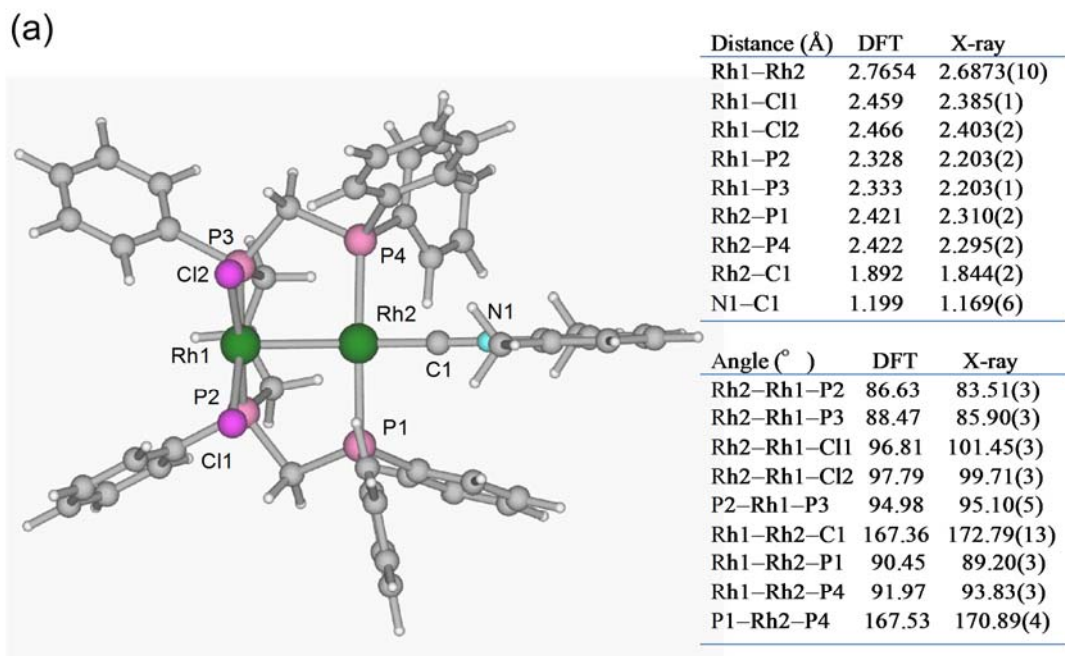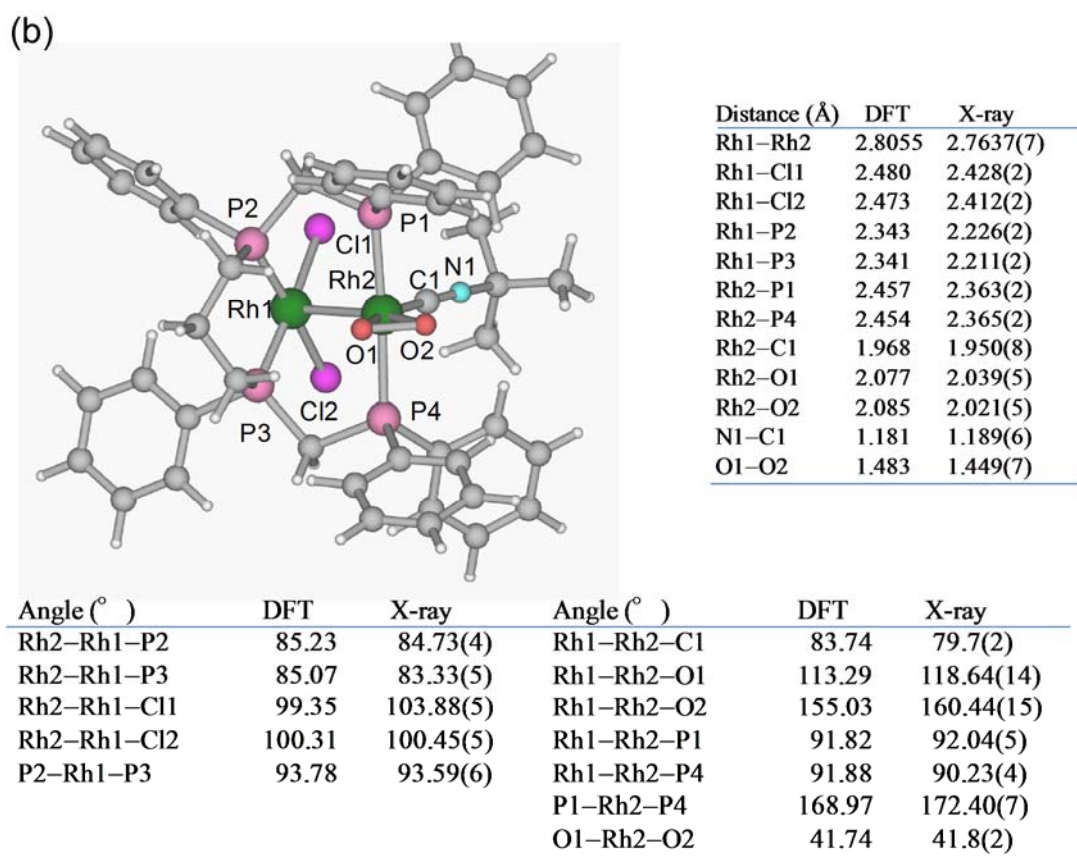

**Figure S13.** Representative MO diagrams for the DFT optimized structure of (a) **1a** and (b) **2d** by B3LYP methods with lanl2dz.

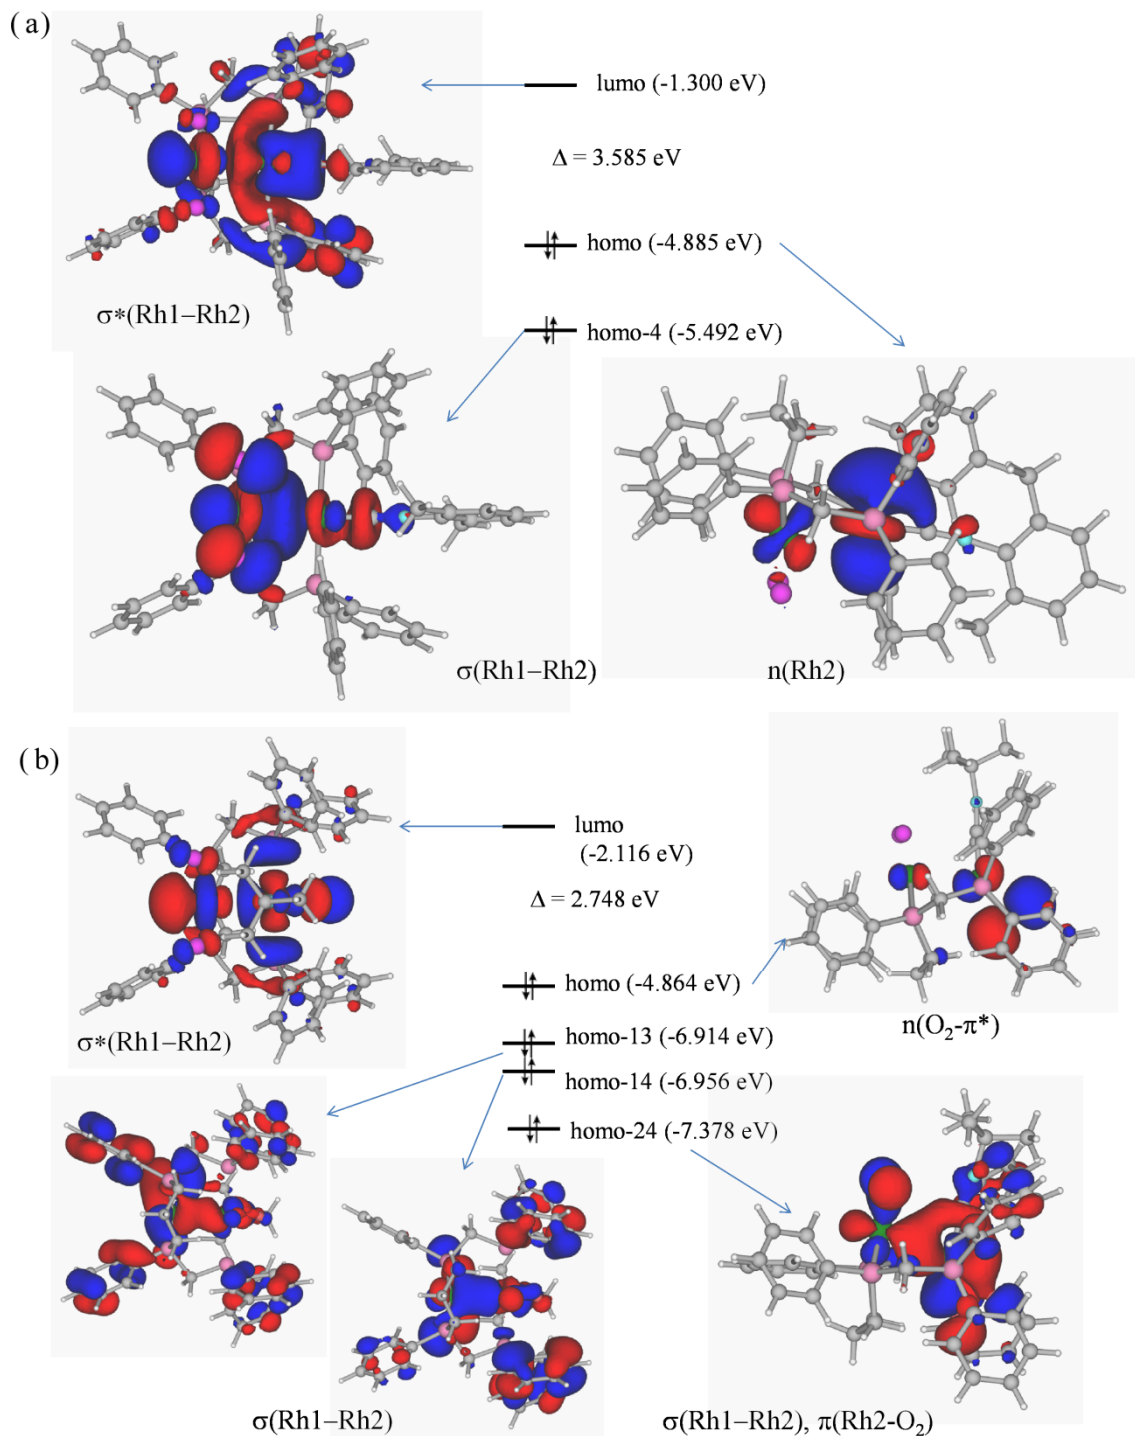

**Figure S14.** Natural population analyses, natural charge and Wiberg bond indices, for the DFT optimized structures of (a) **1a** and (b) **2d** by B3LYP methods with lanl2dz.

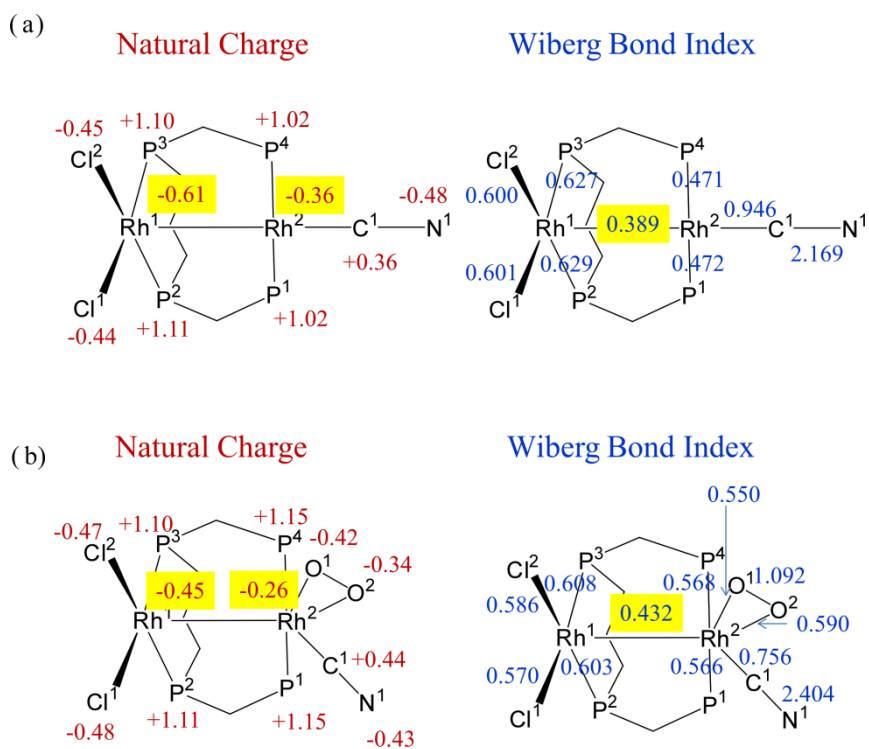

Supplement: c3cc41815d.pdf [file c3cc41815d.pdf]
